# Supplementary material for: The effects of energy paths and emission controls and standards on future trends in China's emissions of primary air pollutants
Source: Copernicus journal article supplement (doi:10.5194/acp-14-8849-2014), 2014-09-01
Supplement: Supplementary file 1 [file acp-14-8849-2014-supplement.pdf]

Supplement of Atmos. Chem. Phys., 14, 8849–8868, 2014  
<http://www.atmos-chem-phys.net/14/8849/2014/>  
doi:10.5194/acp-14-8849-2014-supplement  
© Author(s) 2014. CC Attribution 3.0 License.

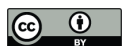

*Supplement of*

## **The effects of energy paths and emission controls and standards on future trends in China's emissions of primary air pollutants**

**Y. Zhao et al.**

*Correspondence to:* Y. Zhao (yuzhao@nju.edu.cn)

# SUPPLEMENT

**Journal:** Atmospheric Chemistry & Physics

**Title:** The effects of energy paths and emission controls and standards on future trends in China's emissions of primary air pollutants

**Authors:** Yu Zhao, Jie Zhang, Chris. P. Nielsen

**Number of figures: 6**      **Number of tables: 3**

## Figure list

Figure S1. Provinces and regions of mainland China. Fine lines indicate the borders of provinces while thick lines indicate those of regions.

Figure S2. Penetrations of SO<sub>2</sub> and NO<sub>x</sub> control devices for certain sectors in NPS-BAS and NPS-REF scenarios. (a) Coal-fired power plants (CPP); (b) Cement production (CEM); and (c) Other industrial coal-fired boilers (OIN-coal).

Figure S3. Penetrations of various dust collectors for selected sources in NPS-BAS and NPS-REF scenarios.

Figure S4. Projected trends in penetrations of technologies (color bars) and emission factors (symbolled lines) for typical sources in China from 2010 to 2030. All panels are for the CPS activity scenario. In each panel, the penetrations of various technologies are indicated on the left-hand vertical axis and the emission factors for BAS, REF, and STD on the right-hand vertical axis.

Figure S5. Projected trends in penetrations of technologies (color bars) and emission factors (symbolled lines) for typical sources in China from 2010 to 2030. All panels are for the 450 activity scenario. In each panel, the penetrations of various technologies are indicated on the left-hand vertical axis and the emission factors for BAS, REF, and STD on the right-hand vertical axis.

Figure S6. Annual NO<sub>2</sub> tropospheric vertical column in mainland China 2010-2013 from OMI satellite retrievals. The data for 2013 are the averages from January to October.

### **Table list**

Table S1. Summary of emission standards for stationary sources included in this work.

Table S2. Removal efficiencies of air pollutant control devices (APCD) used in this work. Values are in percent.

Table S3. Time schedule of implementation of emission standards for the transportation sector assumed in this work.

## Figures

Figure S1.

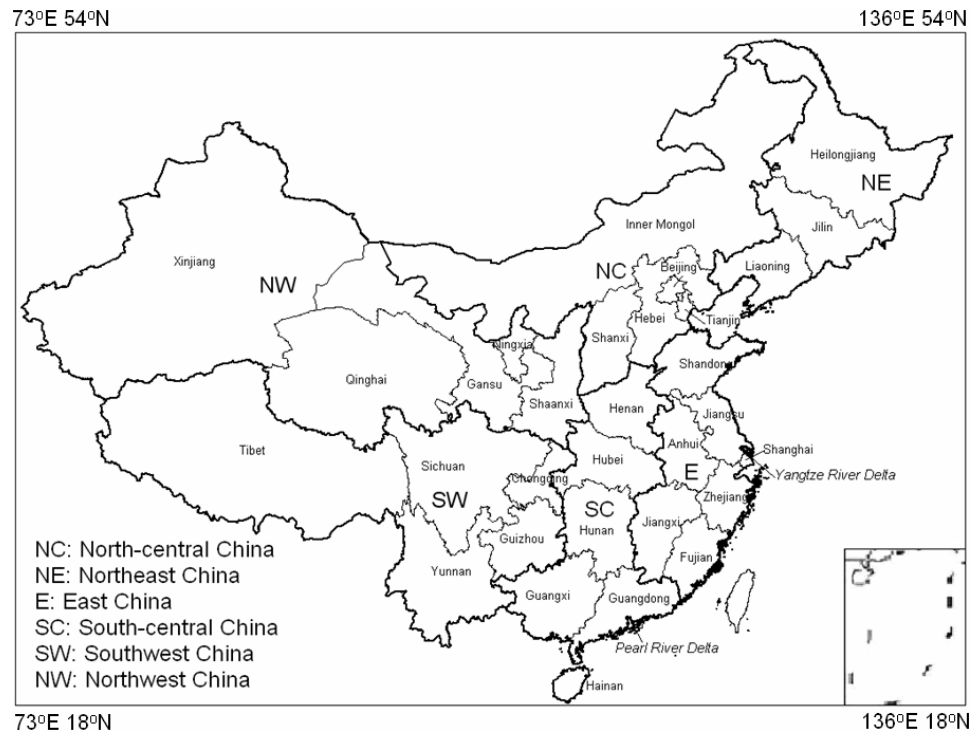

Figure S2.

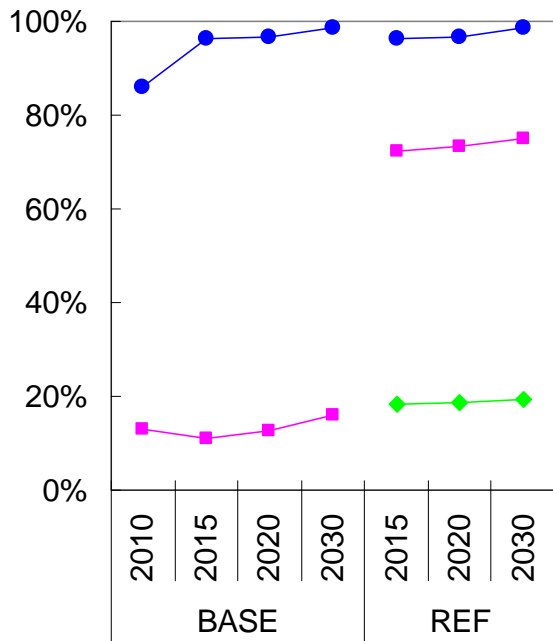

(a) Coal-fired power plants

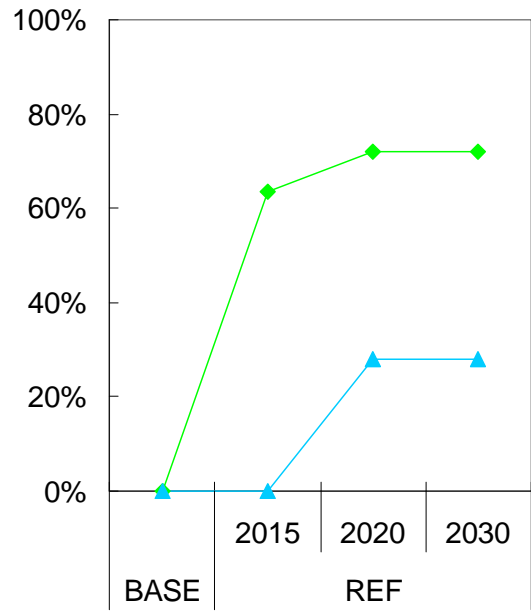

(b) Cement production (precalciner)

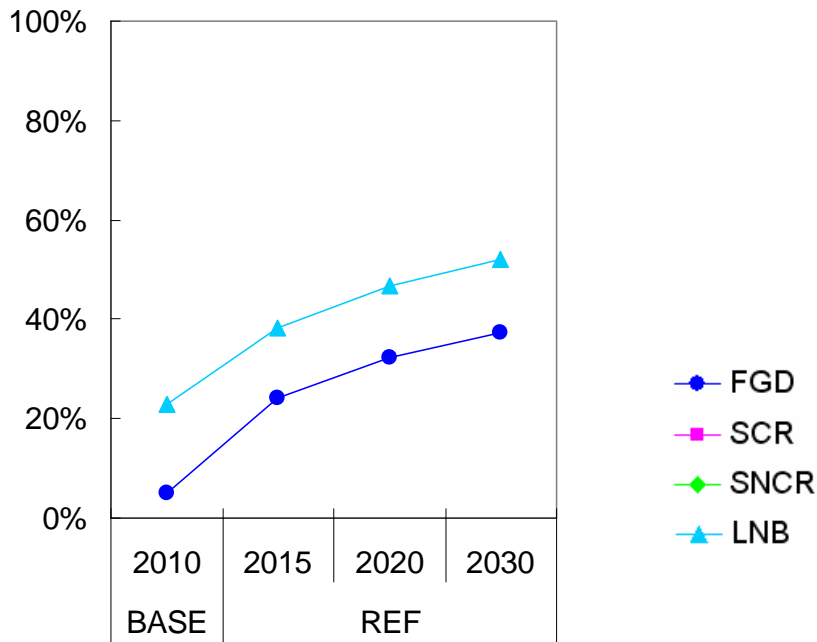

(c) Other industrial coal-fired boilers

Figure S3.

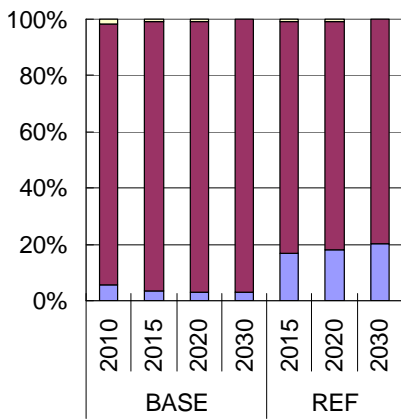

(a) Coal-fired power plants

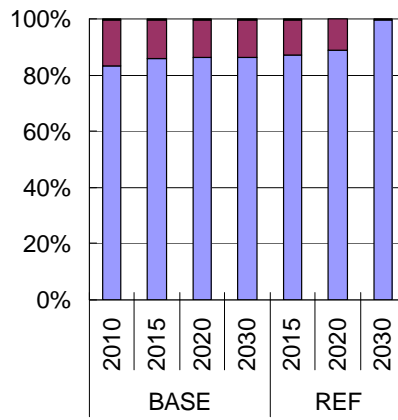

(b) Cement production (precalciner)

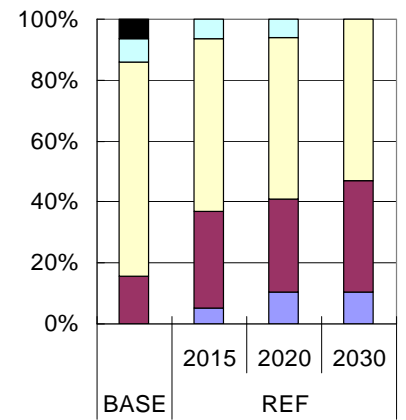

(c) Machinery coking plants

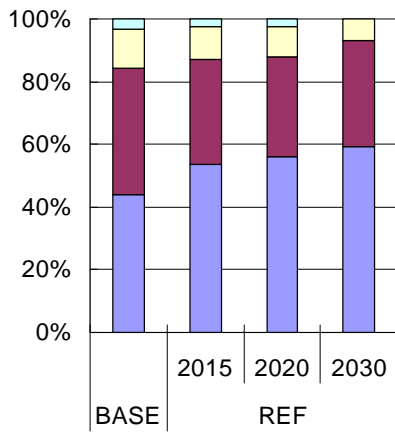

(d) Sintering

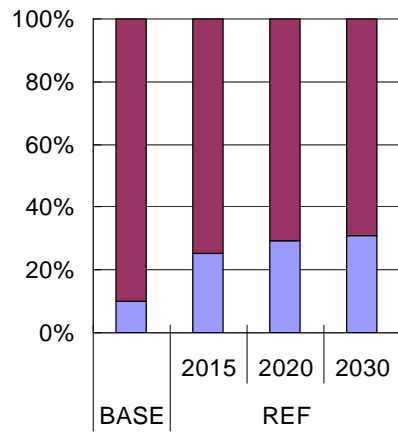

(e) Blast furnaces (iron production)

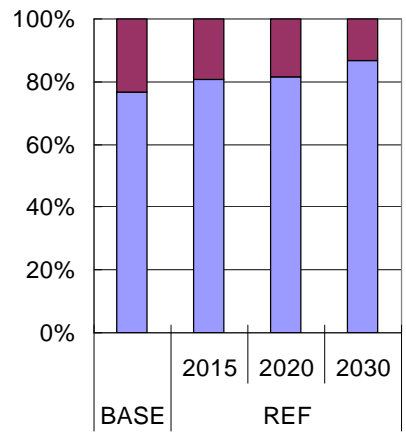

(f) Basic oxygen furnaces (steel making)

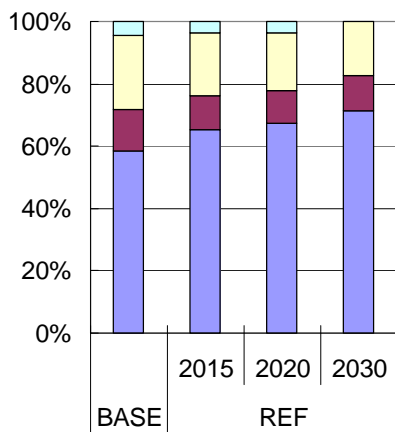

(g) Electric furnaces (steel making)

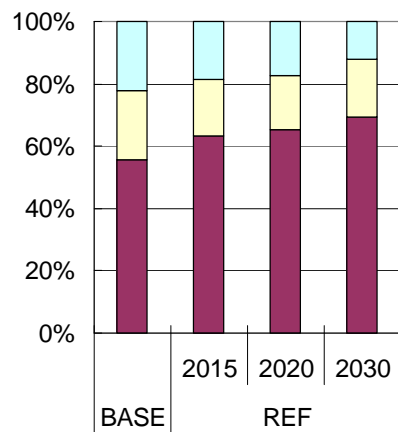

(h) Casting

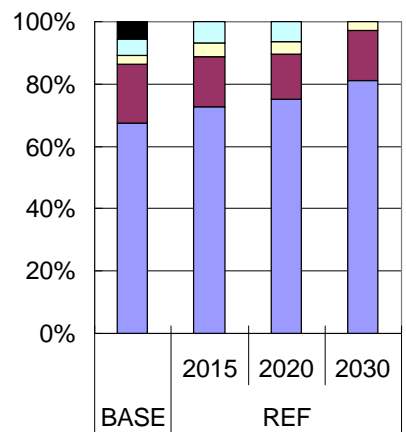

(i) Nonferrous metal (Cu, Zn and Pb)

Figure S3 (continued).

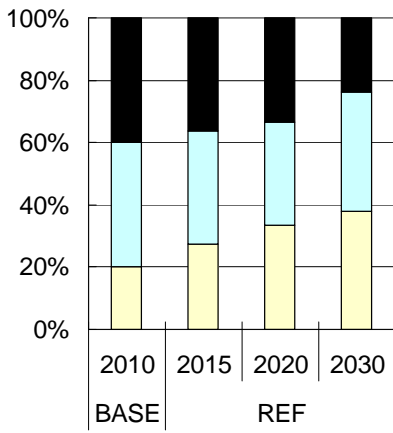

(j) Brick production

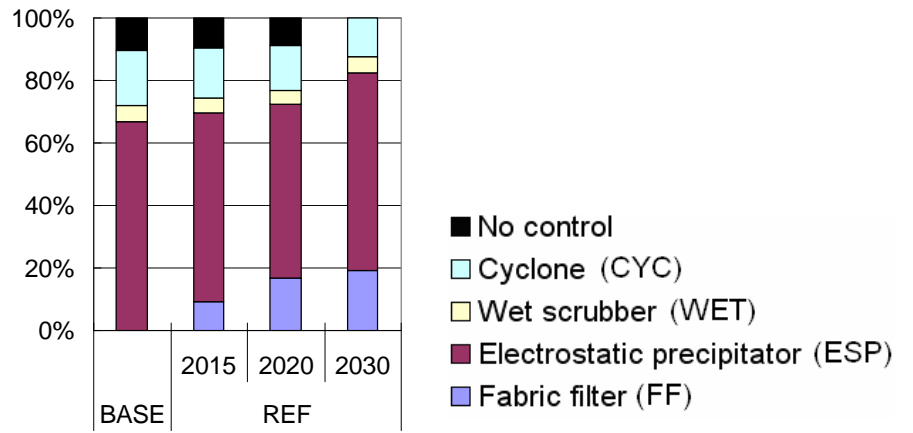

(k) Lime production

Figure S4

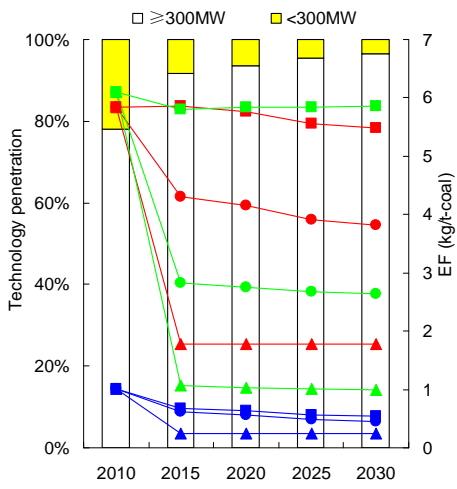

(a) Coal-fired power plants

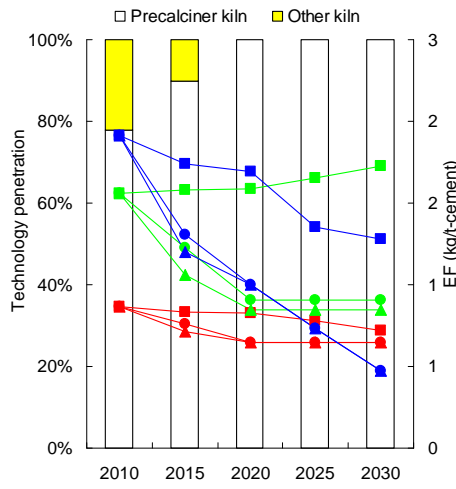

(b) Cement production

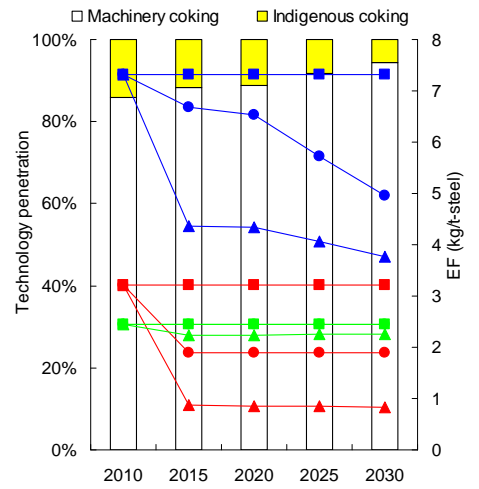

(c) Iron & steel production

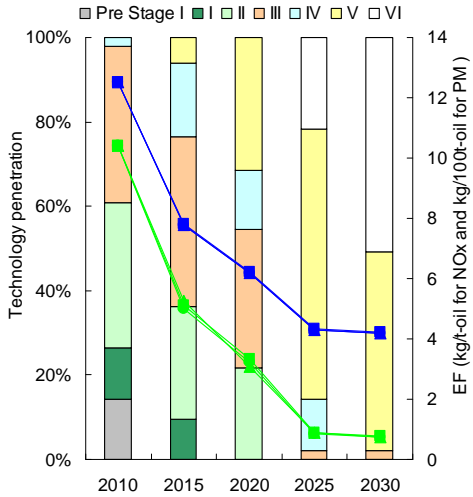

(d) Light-duty gasoline vehicles

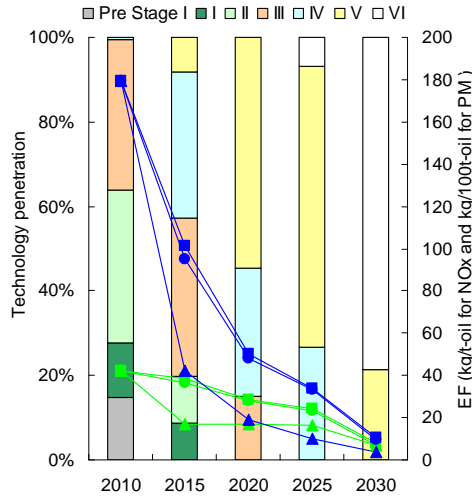

(e) Heavy-duty diesel vehicles

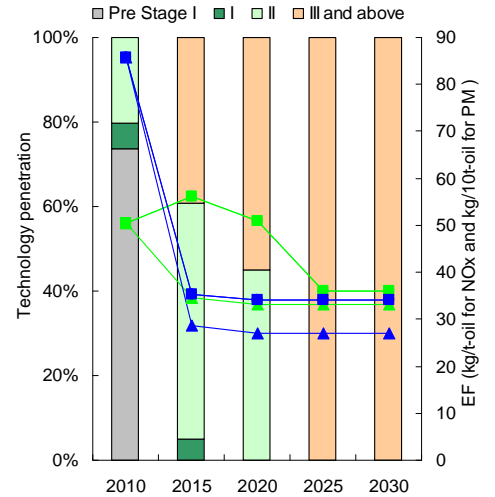

(f) Rural vehicles

■ BAS ● REF ▲ STD ■ SO<sub>2</sub> ■ NO<sub>x</sub> ■ PM



Figure S5

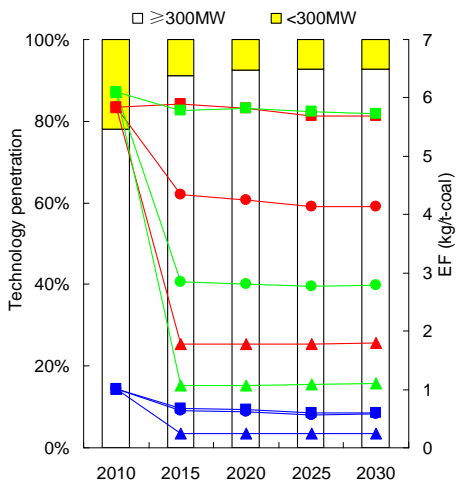

(a) Coal-fired power plants

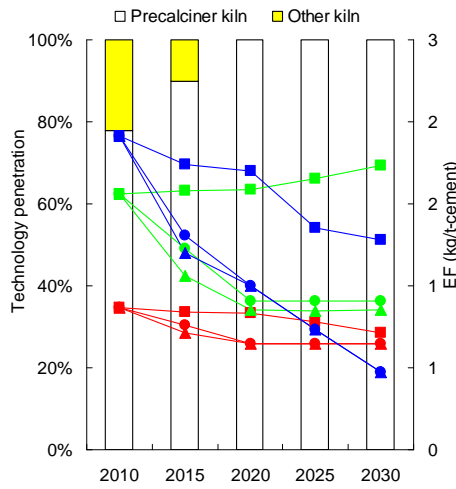

(b) Cement production

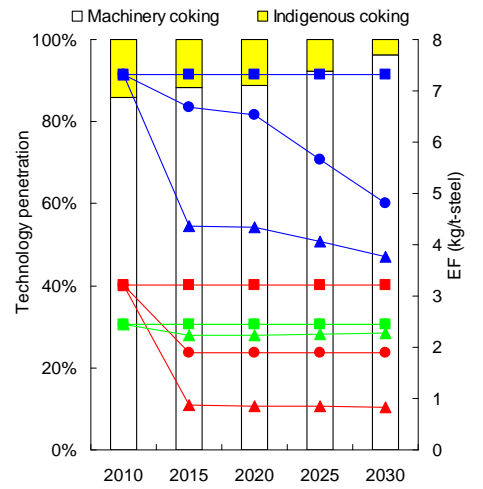

(c) Iron & steel production

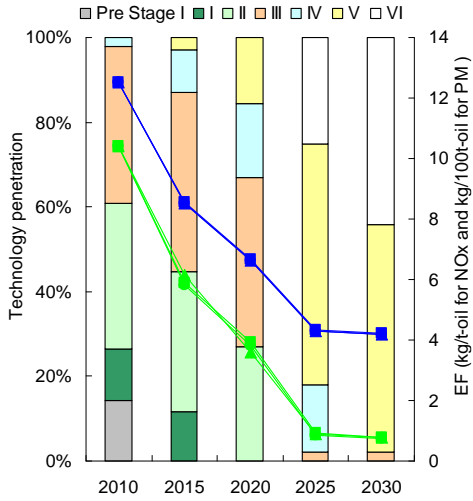

(d) Light-duty gasoline vehicles

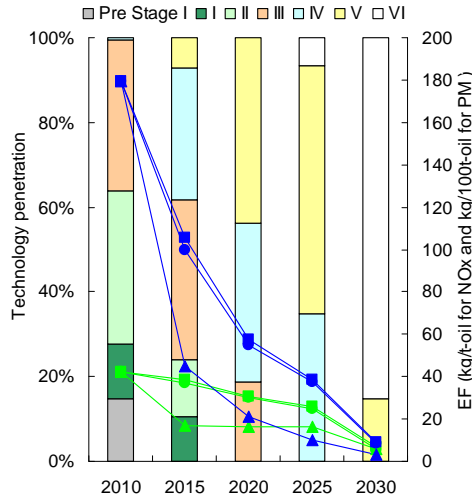

(e) Heavy-duty diesel vehicles

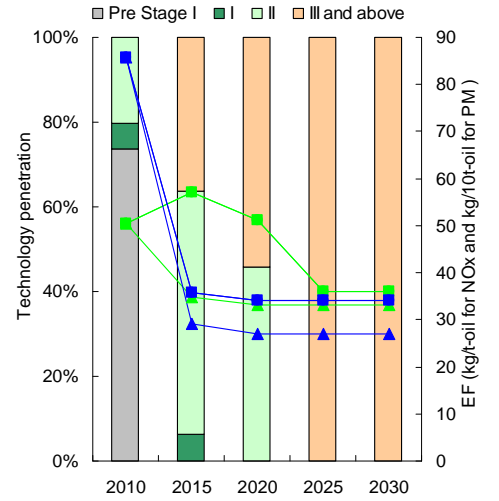

(f) Rural vehicles

■ BAS ● REF ▲ STD ■ SO<sub>2</sub> ■ NO<sub>x</sub> ■ PM

Figure S6

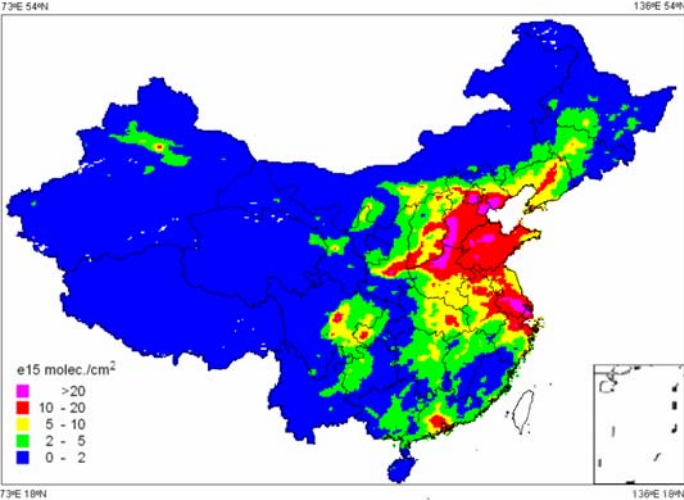

(a) 2010

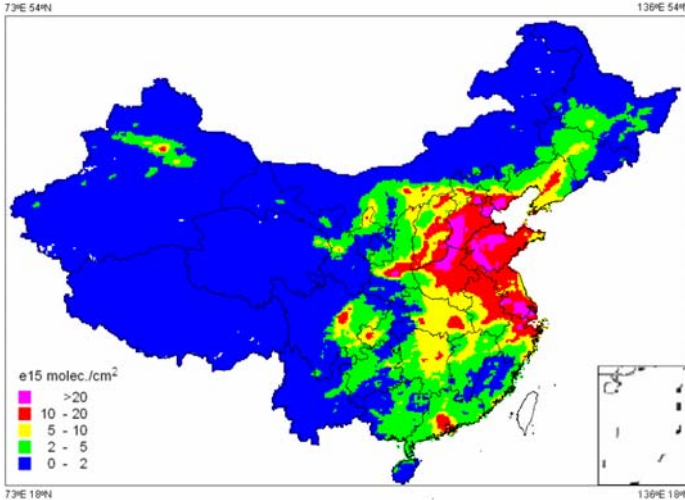

(b) 2011

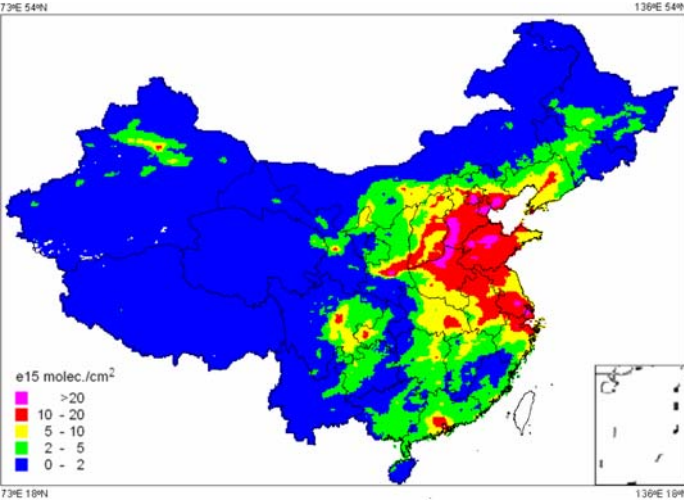

(c) 2012

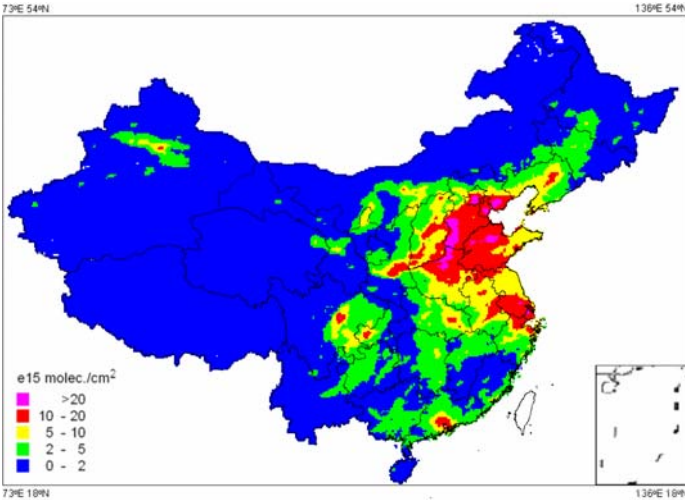

(d) 2013 (averages of January-October)

## Tables

Table S1. The summary of emission standards for stationary sources included in this work.

| Sector                     | Standard         | Issued time            | Title                                                                                        |
|----------------------------|------------------|------------------------|----------------------------------------------------------------------------------------------|
| Power                      | GB 13223-2011    | July, 2011             | Emission standard of air pollutants for thermal power plants                                 |
| Iron & steel production    | GB 16171-2012    | June, 2012             | Emission standard of air pollutants for coking chemical industry                             |
|                            | GB 28662-2012    | June, 2012             | Emission standard of air pollutants for sintering and pelletizing of iron and steel industry |
|                            | GB 28663-2012    | June, 2012             | Emission standard of air pollutants for iron smelt industry                                  |
|                            | GB 28664-2012    | June, 2012             | Emission standard of air pollutants for steel smelt industry                                 |
| Non ferrous metal smelting | GB 25465-2010    | Sep, 2010              | Emission standard of pollutants for aluminum industry                                        |
|                            | GB 25466-2010    | Sep, 2010              | Emission standard of pollutants for lead and zinc industry                                   |
|                            | GB 25467-2010    | Sep, 2010              | Emission standard of pollutants for copper, nickel, cobalt industry                          |
| Brick production           | N/A <sup>a</sup> | Nov, 2009 <sup>b</sup> | Emission standard of air pollutants for brick industry                                       |
| Cement production          | N/A <sup>a</sup> | -                      | Emission standard of air pollutants for cement industry                                      |

<sup>a</sup> Proposed standard, not officially issued yet; <sup>b</sup> Proposed time.

Table S2. Average removal efficiencies of various air pollutant control devices (APCD) used in this work. Values are in percent.

|           | SO <sub>2</sub> | NO <sub>x</sub> | PM <sub>2.5</sub>  | PM <sub>2.5-10</sub> | PM <sub>&gt;10</sub> | Data sources                                                                               |
|-----------|-----------------|-----------------|--------------------|----------------------|----------------------|--------------------------------------------------------------------------------------------|
| Wet-FGD   | 80 <sup>a</sup> | -               | 53.74              | 81.21                | 92.63                | Field survey (unpublished); filed tests and data integration (Zhao et al., 2010; 2011)     |
|           | 70 <sup>b</sup> | -               | 53.74              | 81.21                | 92.63                | MEP (2010); filed tests and data integration (Zhao et al., 2010; 2011)                     |
|           | 50 <sup>c</sup> | -               | -                  | -                    | -                    | Field survey (unpublished); conservatively assumed                                         |
| Other-FGD | 30              | -               | -                  | -                    | -                    | Field tests (Zhao et al., 2010; 2011)                                                      |
| LNB       | -               | 30              | -                  | -                    | -                    | Field tests (Zhao et al., 2010; 2011)                                                      |
| SCR       | -               | 60              | -                  | -                    | -                    | Field survey (unpublished); personal communication with China Electricity Council director |
| SNCR      | -               | 50              | -                  | -                    | -                    | Field survey (unpublished); Zhao et al. (2013); conservatively assumed                     |
| FF        | -               | -               | 99.30              | 99.70                | 99.95                | Field tests (Zhao et al., 2010; 2011)                                                      |
| ESP       | -               | -               | 92.31              | 96.97                | 99.46                | Field tests and data integration (Zhao et al., 2010; 2011)                                 |
| WET       | 20              | -               | 67.40 <sup>d</sup> | 85.74 <sup>d</sup>   | 96.51 <sup>d</sup>   | Field tests (Zhao et al., 2010; 2011)                                                      |
|           | 20              | -               | 56.96 <sup>e</sup> | 84.01 <sup>e</sup>   | 96.49 <sup>e</sup>   | Lei et al. (2011); Zhao et al. (2011)                                                      |
| CYC       | -               | -               | 13                 | 75                   | 90                   | Lei et al. (2011); Zhao et al. (2011)                                                      |

<sup>a</sup> For CPP in REF scenarios; <sup>b</sup> For CPP in BAS scenarios and other industrial sources (except for sintering); <sup>c</sup> For sintering process in REF scenarios; <sup>d</sup> For CPP; and <sup>e</sup> For sources other than CPP.

Table S3. The national time schedule of implementation of emission standards for transportation sector assumed in this work.

|                              | Stage I | II   | III  | IV   | V    | VI   |
|------------------------------|---------|------|------|------|------|------|
| On-road vehicle <sup>a</sup> | 2000    | 2005 | 2008 | 2013 | 2016 | 2026 |
| On-road vehicle <sup>b</sup> | 1999    | 2003 | 2005 | 2008 | 2013 | 2016 |
| On-road vehicle <sup>c</sup> | 2000    | 2005 | 2008 | 2011 | 2014 | 2021 |
| RV <sup>a</sup>              | 2000    | 2005 | 2008 | 2013 | 2016 | 2026 |
| RV <sup>b, c</sup>           | 2000    | 2005 | 2008 | 2011 | 2014 | 2021 |
| Motorcycle                   | 2003    | 2005 | 2010 | -    | -    | -    |
| Tractor                      | 2006    | 2007 | 2014 | -    | -    | -    |
| Machine                      | 2011    | 2014 | 2016 | -    | -    | -    |
| Train and inland ship        | 2011    | 2014 | -    | -    | -    | -    |

<sup>a</sup> For BAS scenarios; <sup>b</sup> For REF scenarios in Beijing; <sup>c</sup> For REF scenarios in Tianjin, Shanghai, Jiangsu, Zhejiang and Guangdong.

## REFERENCES

Lei, Y., Zhang, Q., He, K. B., and Streets, D. G.: Primary anthropogenic aerosol emission trends for China, 1990-2005, *Atmos. Chem. Phys.*, 11, 931-954, 2011.

Ministry of Environmental Protection in China (MEP): The handbook of emission factors of industrial sources for the first national survey on pollutant sources, 2010 (in Chinese).

Zhao, B., Wang, S. X., Liu, H., Xu, J. Y., Fu, K., Klimont, Z., Hao, J. M., He, K. B., Cofala, J., and Amann, M.: NO<sub>x</sub> emissions in China: historical trends and future perspectives, *Atmos. Chem. Phys.*, 13, 9869-9897, 2013.

Zhao, Y., Nielsen, C. P., Lei, Y., McElroy, M. B., and Hao, J. M.: Quantifying the uncertainties of a bottom-up emission inventory of anthropogenic atmospheric pollutants in China, *Atmos. Chem. Phys.*, 11, 2295-2308, 2011.

Zhao, Y., Wang, S. X., Nielsen, C. P., Li, X. H., and Hao, J. M.: Establishment of a database of emission factors for atmospheric pollutants from Chinese coal-fired power plants, *Atmos. Environ.*, 44, 1515-1523, 2010.
